# Supplementary material for: Single Pt atom supported on penta-graphene as an efficient catalyst for CO oxidation
Source: Royal Society of Chemistry journal article supplement (doi:10.1039/c9cp02306b), 2019-01-01
Supplement: c9cp02306b1.pdf [file c9cp02306b1.pdf]

Supporting Information for  
Single Pt atom supported on penta-graphene as an efficient catalyst for  
CO oxidation

Ranganathan Krishnan, Shiu-an-Yau Wu, and Hsin-Tsung Chen \*

Department of Chemistry and R&D Center for Membrane Technology, Chung Yuan Christian  
University, Chungli District, Taoyuan City, 32023, Taiwan

\*Corresponding author. E-mail: htchen@cycu.edu.tw (H.-T.C.); Tel: +886-3-265-3324

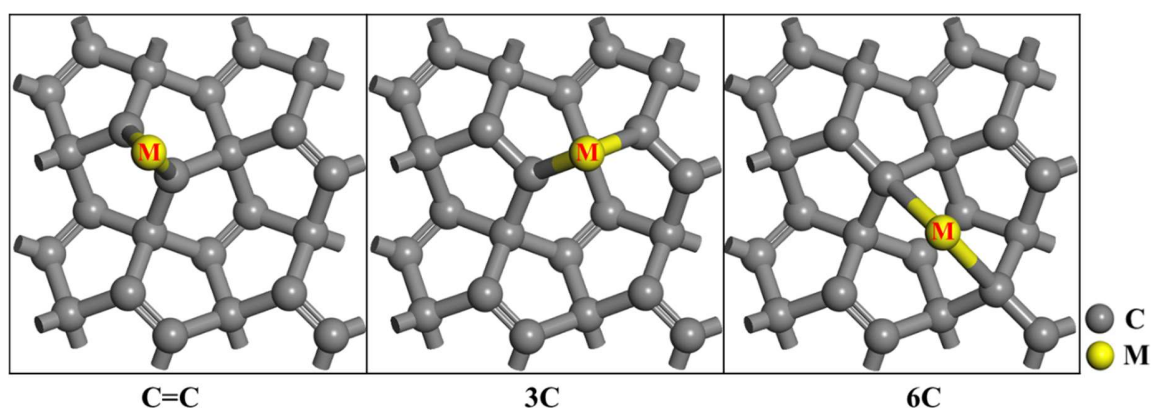

**Figure S1.** Three possible active sites for single-metal atom supported on penta-graphene: C=C, 3C and 6C sites, respectively.

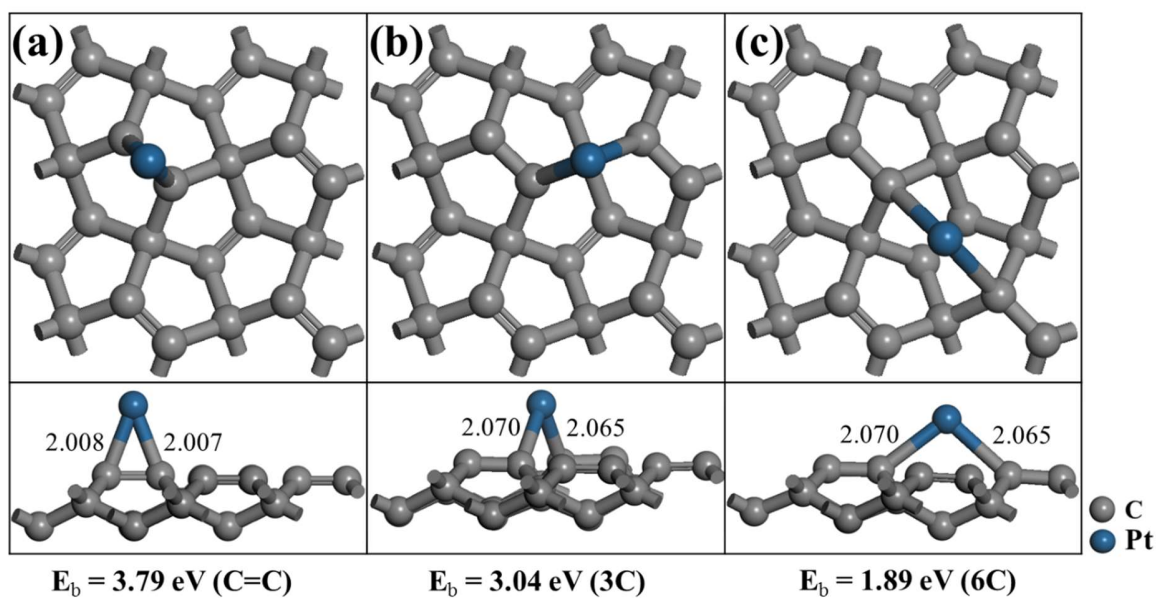

**Figure S2.** Optimized configurations with binding energies for single Pt atom supported on different sites of penta-graphene: (a) C=C site. (b) 3C and (c) 6C, respectively.

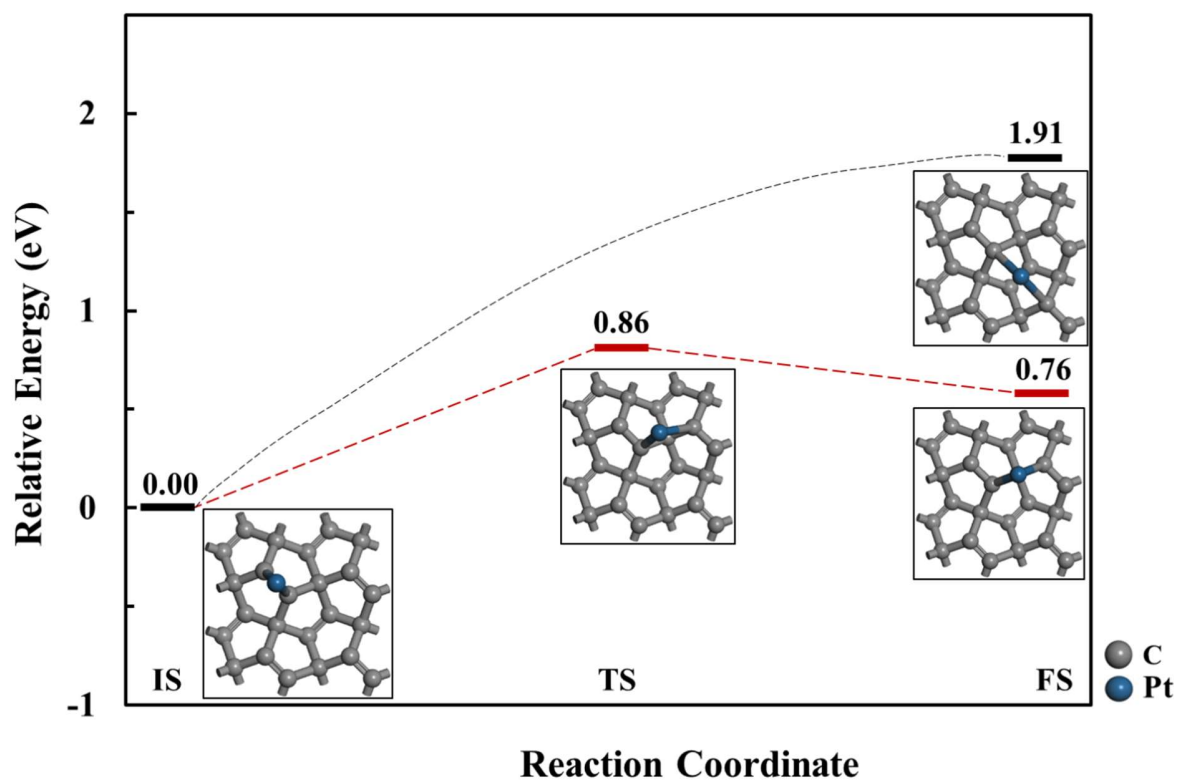

**Figure S3.** The diffusion paths of Pt on penta-graphene. Red line (Path A) and black line (Path B) represent Pt atom diffuses from C=C site to 3C site and 6C site, respectively.

**Table S1.** The predicted binding energy  $E_b$  (eV), Bader charge and diffusion barriers (eV) for single Pt, Cu and Fe atoms supported on penta-graphene.

| Atoms | Sites | $E_b$ (eV) | Bader charge $ e $ | Diffusion barriers (eV)             |
|-------|-------|------------|--------------------|-------------------------------------|
| Pt    | C=C   | 3.79       | 0.1                |                                     |
|       | 3C    | 3.04       | 0.24               | 0.86 <sup>red line (Path A)</sup>   |
|       | 6C    | 1.89       | 0.2                | 1.84 <sup>black line (Path B)</sup> |
| Cu    | C=C   | 1.25       | 0.28               |                                     |
|       | 3C    | 1.24       | 0.43               | 0.06 <sup>red line (Path A)</sup>   |
|       | 6C    | 1.13       | 0.43               | 0.11 <sup>black line (Path B)</sup> |
| Fe    | C=C   | 2.3        | 0.7                |                                     |
|       | 3C    | 2.37       | 0.83               | 0.20 <sup>red line (Path A)</sup>   |
|       | 6C    | 1.6        | 0.85               | 0.93 <sup>black line (Path B)</sup> |

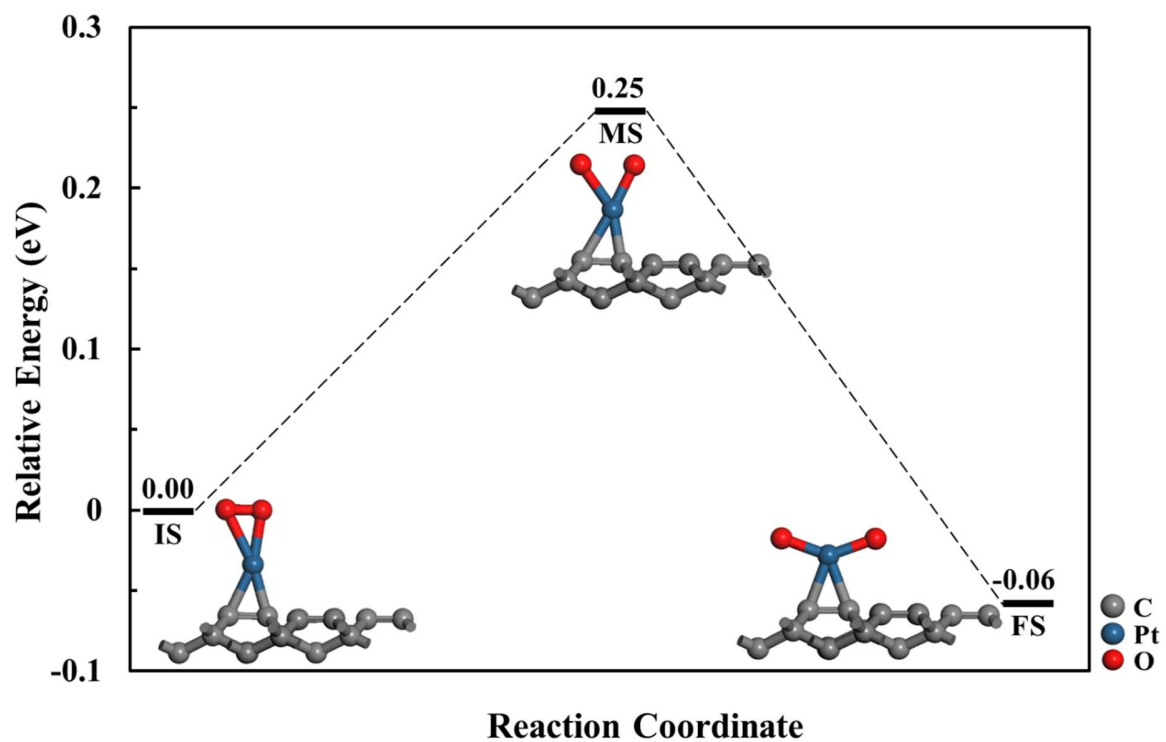

**Figure S4.** Energy profile for O<sub>2</sub> dissociation on the Pt/PtPG involving the initial state (IS), the transition state (TS) and the final state (FS).

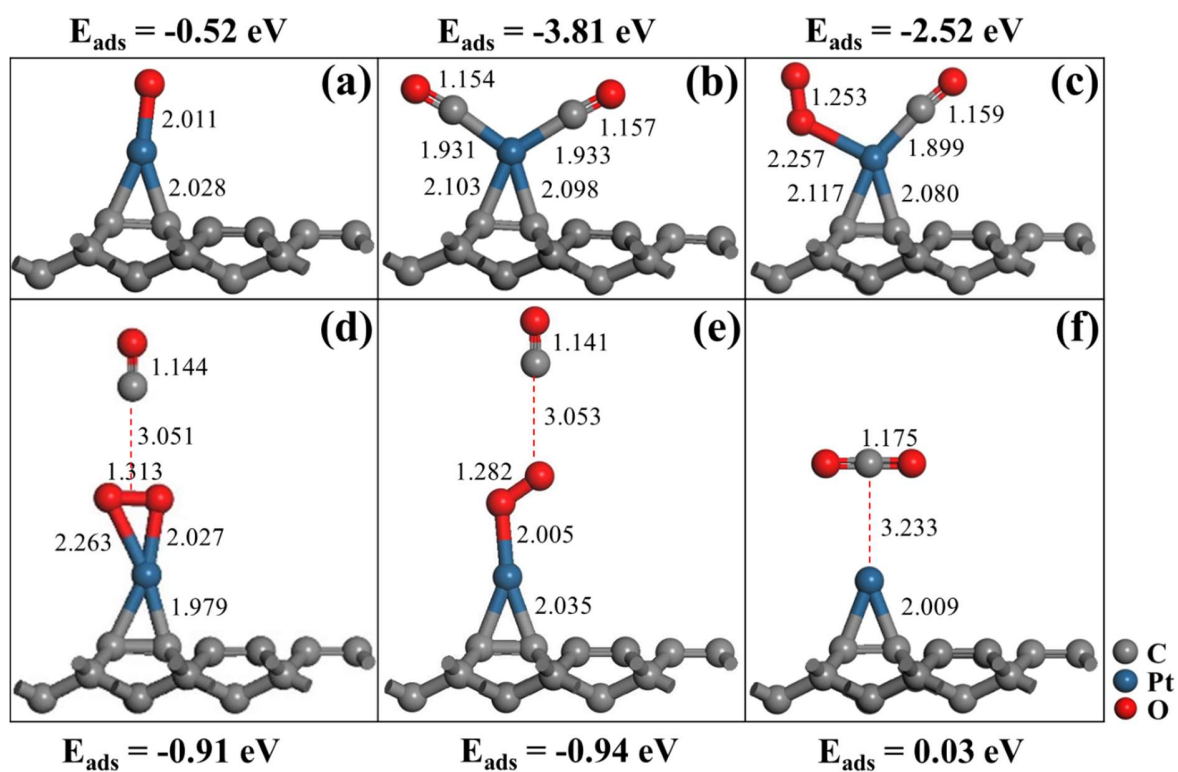

**Figure S5.** Optimized adsorption configurations with calculated adsorption energies: (a) atomic O, (b) co-adsorption of 2CO, (c) co-adsorption of O<sub>2</sub> and CO, (d) pre-adsorption of CO on adsorbed O<sub>2</sub> (side-on) (e) pre-adsorption of CO on adsorbed O<sub>2</sub> (end-on) and (f) CO<sub>2</sub> adsorption on the Pt/PG.

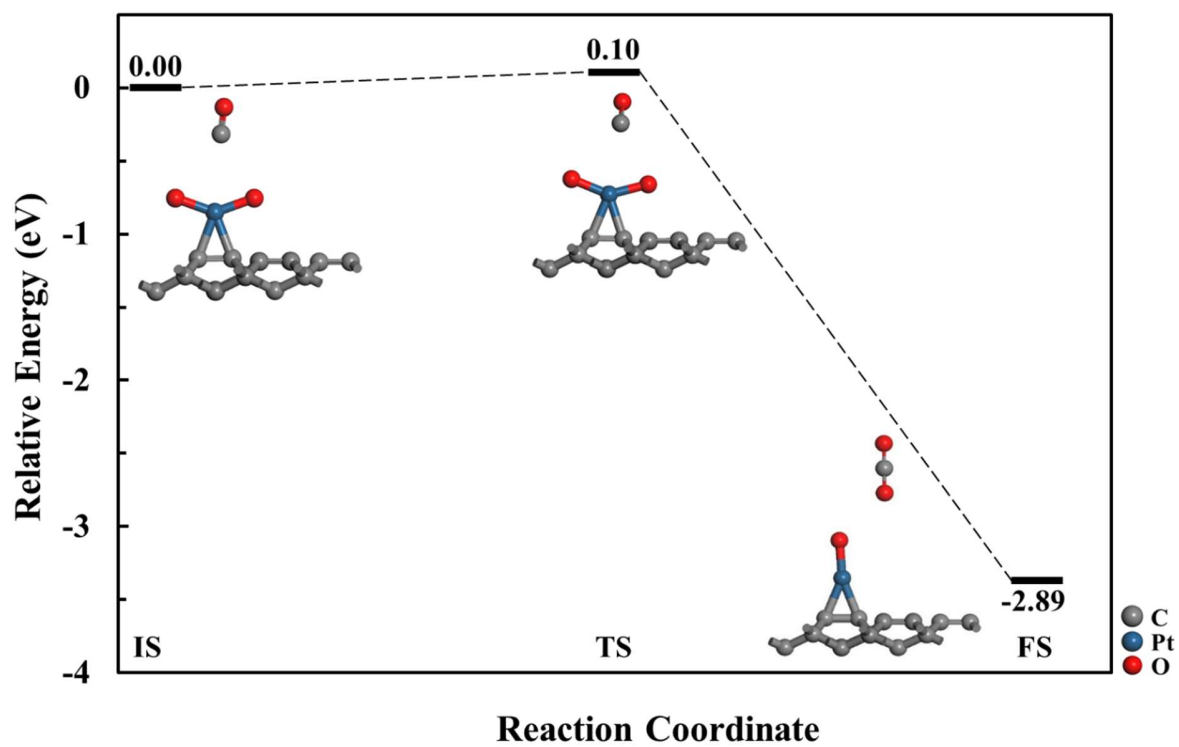

**Figure S6.** Energy profile for ER direct reaction mechanism of CO oxidation by dissociative adsorption of O<sub>2</sub> on the Pt/PG involving the initial state (IS), the transition state (TS) and the final state (FS).



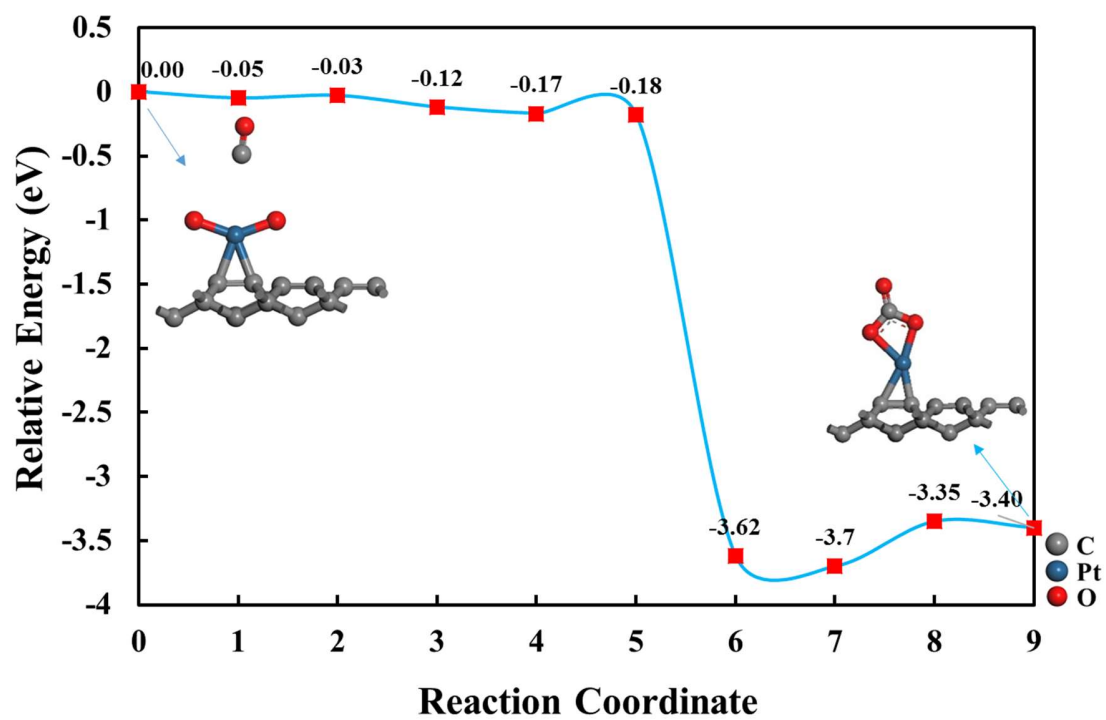

**Figure S7.** Energy profile for ER intermediate formation mechanism by dissociative adsorption of O<sub>2</sub> on the Pt/PG involving the initial state (IS), the transition state (TS) and the final state (FS).
